# Supplementary material for: Striatal Functional Alteration During Incentive Anticipation in Pediatric Anxiety Disorders
Source: Atypon-hosted journal article supplement (doi:10.1176/appi.ajp.2011.11010006), 2011-07-29
Supplement: appi.ajp.2011.11010006.ds001.pdf [file appi.ajp.2011.11010006.ds001.pdf]

Supplemental Figure 1. Schematic of the monetary incentive delay task paradigm with cues and time intervals (adapted from Bjork, Knutson, & Hommer, 2008).

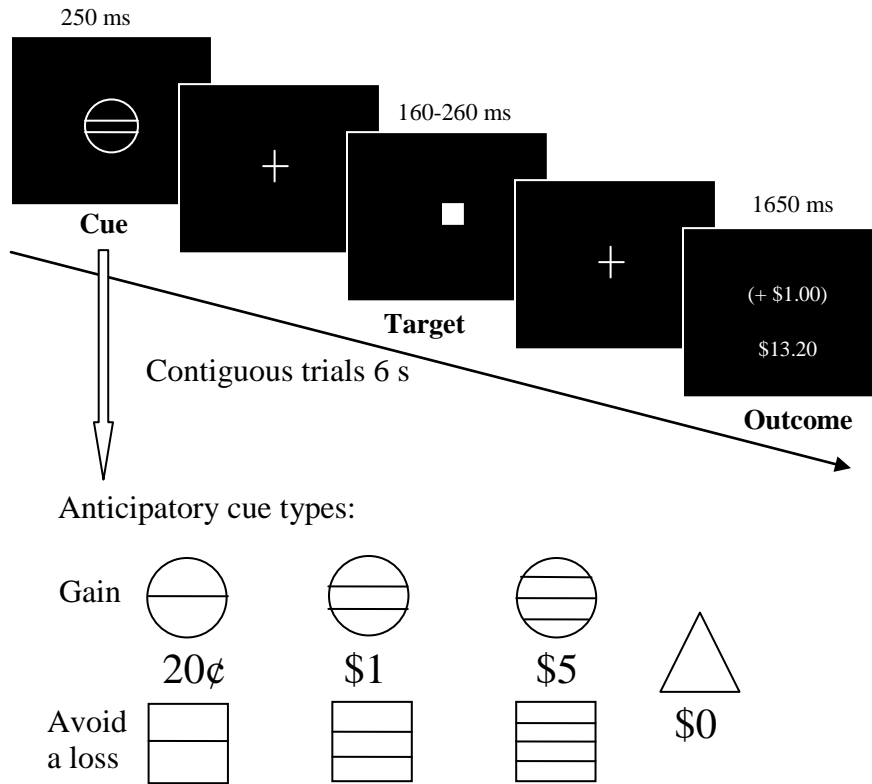

Supplemental Table 1. BOLD Modulation by Task Parameters across the Whole Sample

| <b>BOLD Signal Change in<br/>Regions of Interest</b> | <b>Statistic</b>         | <b>Post-hoc Comparison of Task Effects</b>                                                                                                                               |
|------------------------------------------------------|--------------------------|--------------------------------------------------------------------------------------------------------------------------------------------------------------------------|
| <b>Caudate Nucleus</b>                               |                          |                                                                                                                                                                          |
| Magnitude X valence                                  | $F_{2,110}=5.48, p=.005$ | Medium gains > medium losses ( $p=.02$ )<br>Large gains > large losses ( $p=.002$ )                                                                                      |
| Magnitude                                            | $F_{2,110}=9.73, p<.001$ | Medium > small ( $p=.03$ )<br>Large > small ( $p<.001$ )<br>Large > medium ( $p=.02$ )                                                                                   |
| Valence                                              | $F_{1,55}=5.67, p=.02$   | Gain > loss ( $p=.02$ )                                                                                                                                                  |
| <b>Putamen</b>                                       |                          |                                                                                                                                                                          |
| Magnitude                                            | $F_{2,110}=4.92, p=.009$ | Medium > small ( $p=.05$ )<br>Large > small ( $p=.004$ )                                                                                                                 |
| Valence                                              | $F_{1,55}=7.58, p=.008$  | Gain > loss ( $p=.008$ )                                                                                                                                                 |
| <b>Nucleus Accumbens</b>                             |                          |                                                                                                                                                                          |
| Magnitude X valence                                  | $F_{2,110}=5.09, p=.008$ | Medium gains > small gains ( $p=.03$ )<br>Large gains > small gains ( $p=.001$ )<br>Medium gains > medium losses ( $p<.001$ )<br>Large gains > large losses ( $p=.003$ ) |
| Valence                                              | $F_{1,55}=9.96, p=.003$  | Gain > loss ( $p=.003$ )                                                                                                                                                 |
